# Supplementary material for: Transcriptomic regulations of heat stress response in the liver of lactating dairy cows
Source: Springer Nature journal article supplement (doi:10.1186/s12864-023-09484-1), 2023-07-20

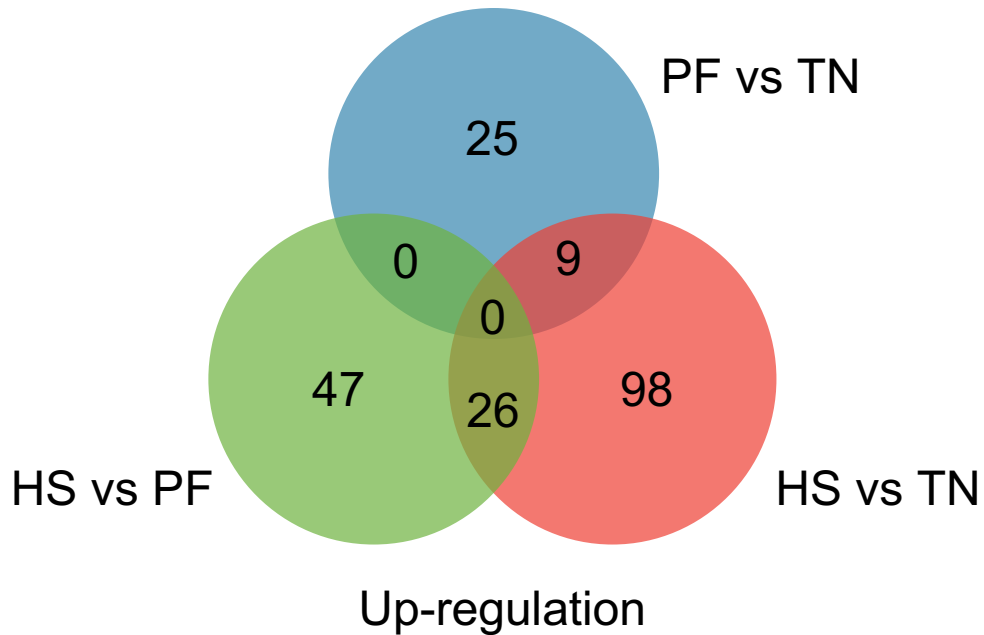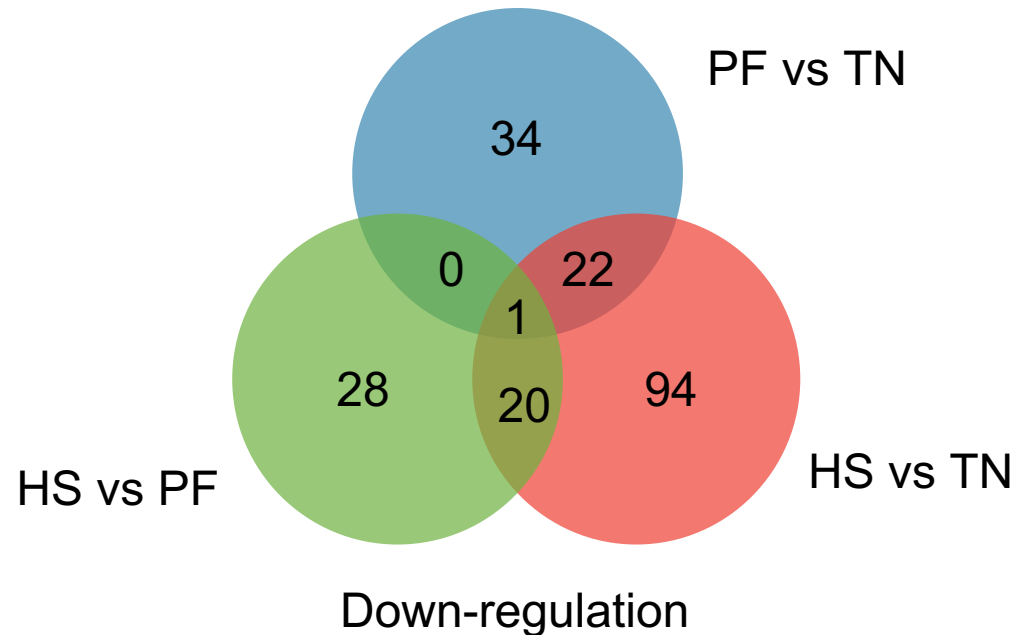

Supplement: MOESM6 [file 12864_2023_9484_MOESM6_ESM.pdf]
